# Supplementary material for: Cadherins Associate with Distinct Stem Cell-Related Transcription Factors to Coordinate the Maintenance of Stemness in Triple-Negative Breast Cancer
Source: Hindawi journal article supplement (doi:10.1155/2017/5091541), 2017-01-01
Supplement: f1 [file 5091541.f1.pdf]

**Cadherins associate with distinct stem cell-related transcription factors to coordinate the maintenance of stemness in triple negative breast cancer**

Chuanwei Yang,<sup>1</sup> Xuemei Zhao,<sup>2</sup> Naipeng Cui,<sup>1,3</sup> and Yulong Liang<sup>2,4 \*</sup>

<sup>1</sup> Breast Medical Oncology, The University of Texas MD Anderson Cancer Center, Houston, TX, USA.

<sup>2</sup> College of Pharmacy, Taishan Medical University, Tai'an, Shandong, China.

<sup>3</sup> Department of Breast Surgery, Affiliated Hospital of Hebei University, Baoding, Hebei, China.

<sup>4</sup> The Michael E. DeBakey Department of Surgery, Baylor College of Medicine, Houston, TX, USA.

\* Correspondence: Yulong Liang, Ph.D., Email: [yulong@bcm.edu](mailto:yulong@bcm.edu), or [yulong.liang@yahoo.com](mailto:yulong.liang@yahoo.com).

**SUPPLEMENTARY INFORMATION**

**Supplementary Figure S1:** Alterations of all 27 CDHs in TCGA breast cancer datasets (n=960).

**Supplementary Figure S2:** Alterations of all 27 CDHs in TNBC samples from TCGA breast cancer datasets (n=116).

**Supplementary Figure S3:** Alterations of top 24 genes in TCGA breast cancer datasets (n=960).

**Supplementary Figure S4:** Alterations of 7 stem cell-related transcription factors in TCGA TNBC (n=116) (A) and in total TCGA breast samples (n=960) (B).

**Supplementary Figure S5:** Representative data of Fig. 3C.

**Supplementary Table S1:** Correlation of the alterations of CDH1 with ESR1, PGR, and HER2 status.

**Supplementary Table S2:** Correlation of the alterations of CDH1 with stem cell-related transcription factors.

**Supplementary Table S3:** List of genes enriched with the alterations of CDH2/4/6/17 in TCGA breast cancer datasets.

**Supplementary Table S4:** Correlation between stem cell-related transcription factors and ESR1, PGR, HER2 status.

Altered in 668 (70%) of 960 cases/patients

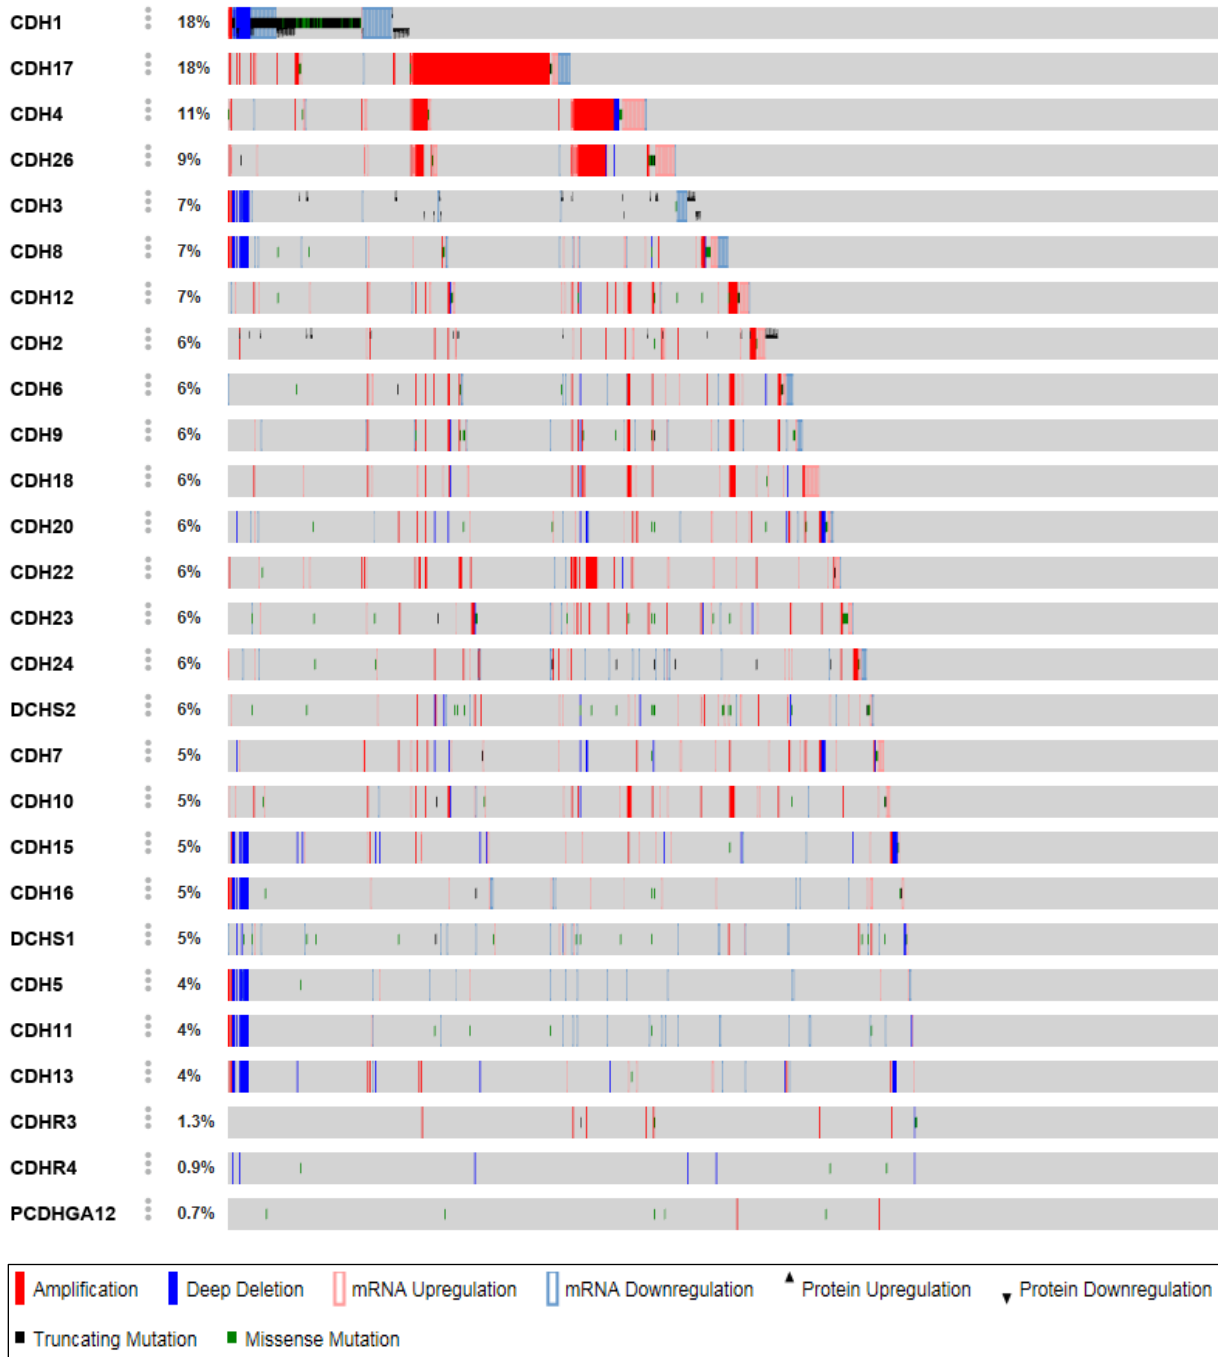

**Figure S1:** Alterations of all 27 CDHs in TCGA breast cancer datasets (n=960). These data were retrieved from cBioPortal with default parameters.

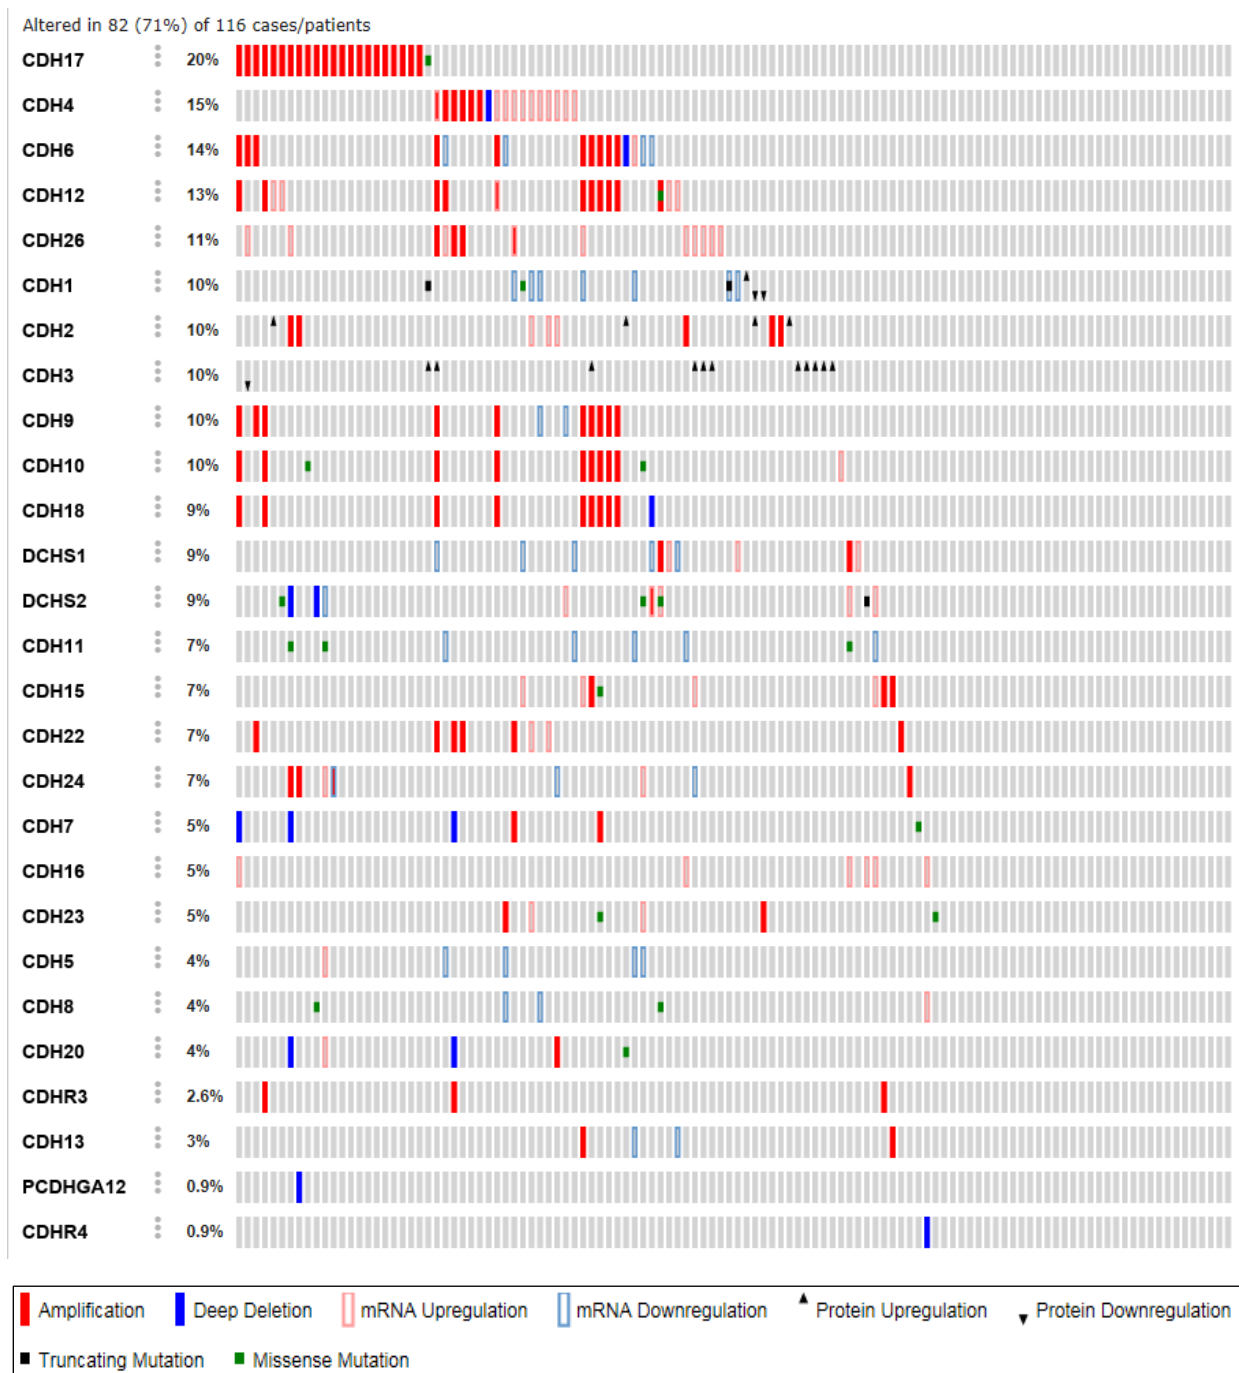

**Figure S2:** Alterations of all 27 CDHs in TNBC samples from TCGA breast cancer datasets (n=116). These data were retrieved from cBioPortal with default parameters.

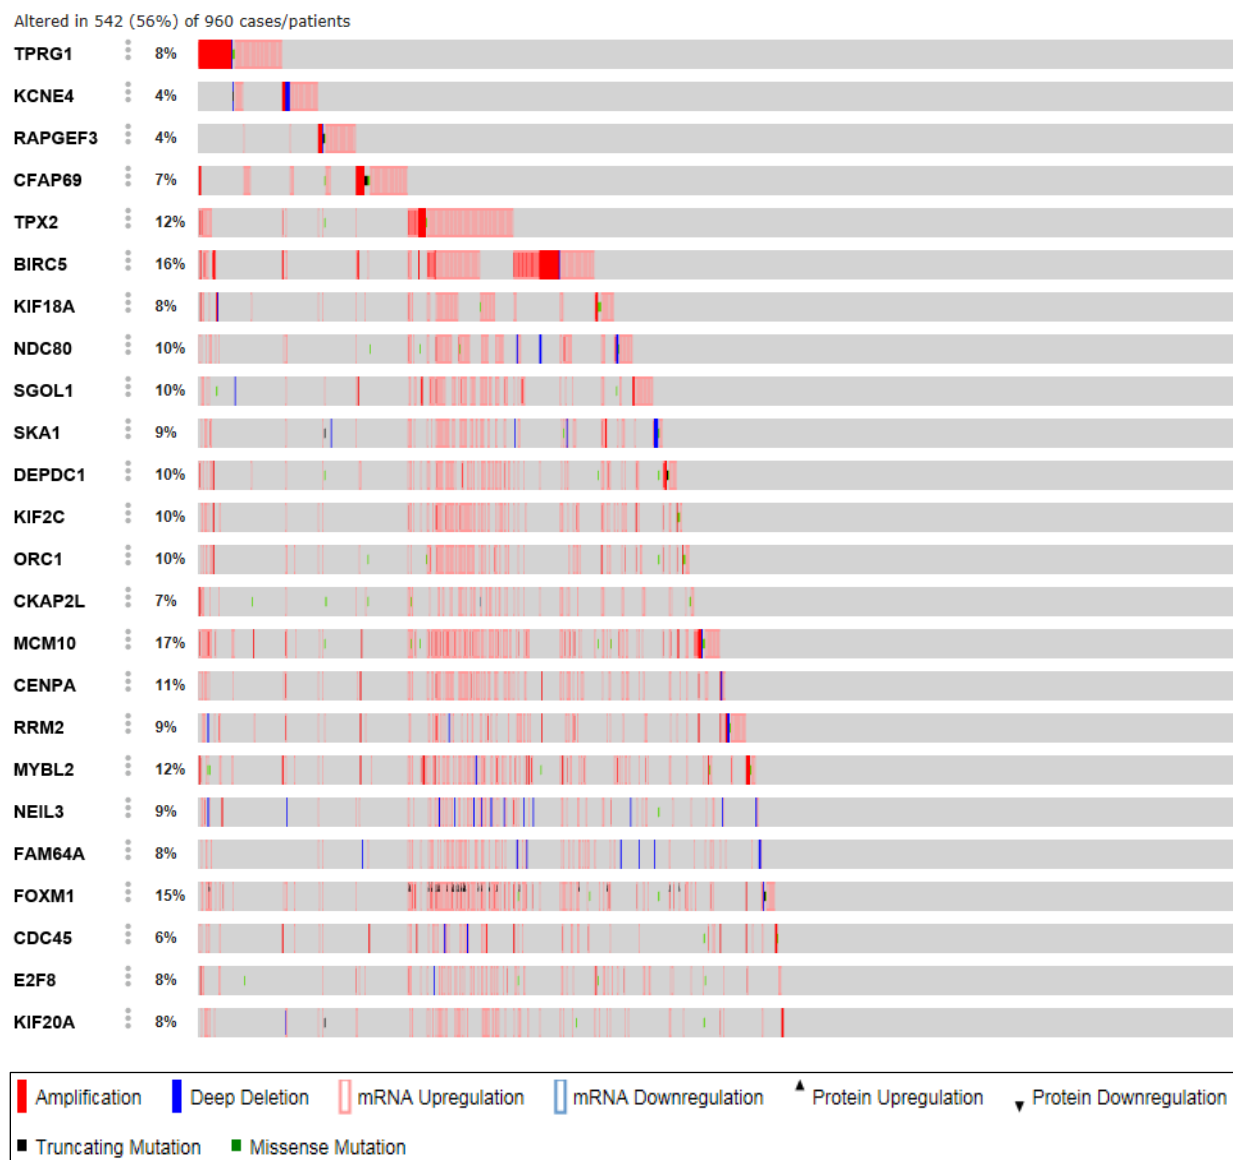

**Figure S3:** Alterations of top 24 genes in TCGA breast cancer datasets (n=960). These data were retrieved from cBioPortal with default parameters.

A

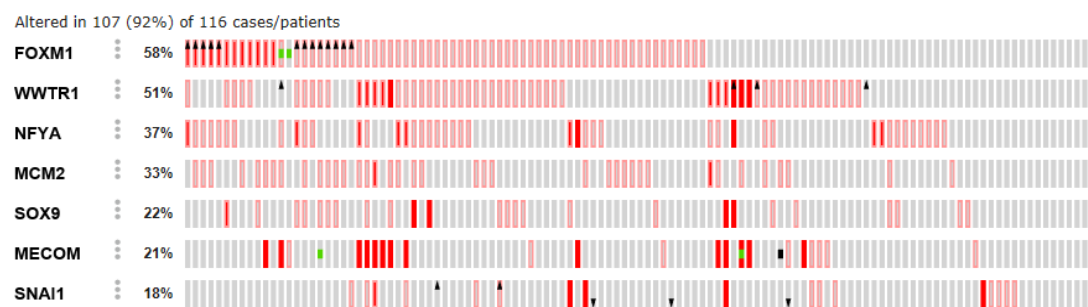

B

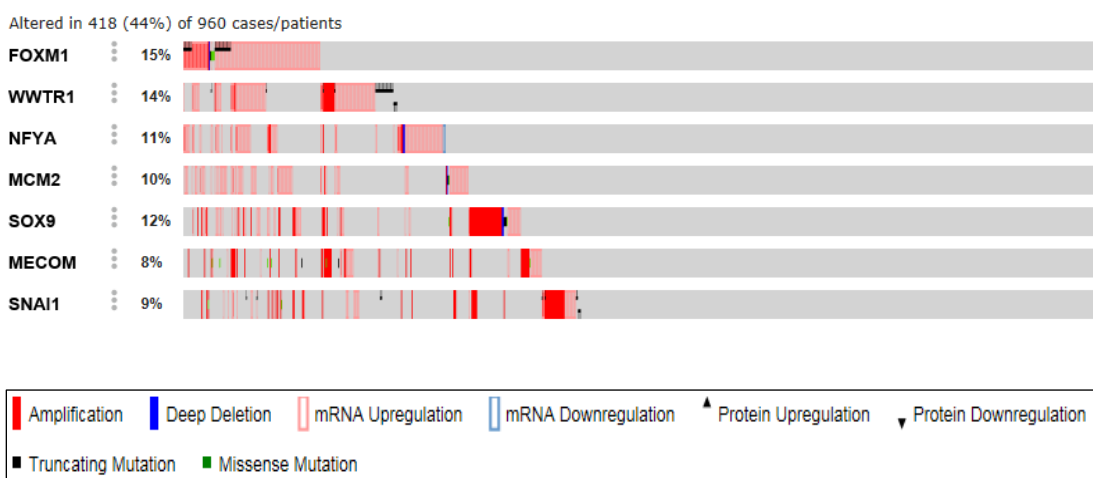

**Figure S4:** Alterations of 7 stem cell-related transcription factors in TCGA TNBC (n=116) (A) and in total TCGA breast samples (n=960) (B).

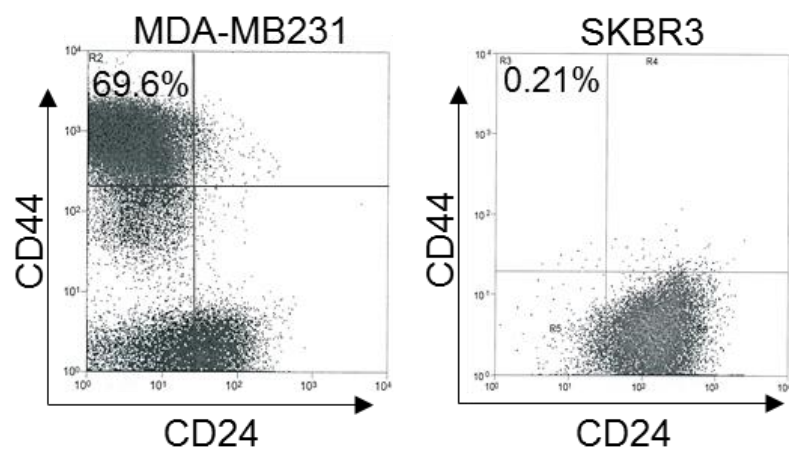

**Figure S5:** Representative data of Fig. 3C.

**Table S1.** Correlation of the alterations of CDH1 with ESR1, PGR, and HER2 status.

| Protein A <sup>a</sup> | Protein B <sup>b</sup> | Correlation <sup>c</sup> | p value <sup>d</sup> |
|------------------------|------------------------|--------------------------|----------------------|
| CDH1                   | ESR1                   | 0.2639                   | 2.1627e-15           |
| CDH1                   | PGR                    | 0.0065826                | 0.84592              |
| CDH1                   | HER2                   | 0.3075                   | 1.3521e-20           |

Note: Data analysis was done on a dataset of TCPA Breast Invasive Carcinoma with 901 samples where RPPA data were available (<http://tcpaportal.org/tcpa>).

*a*, CDH1, E-cadherin; *b*, ESR1, estrogen receptor  $\alpha$ ; PGR, progesterone receptor; HER2, epidermal growth factor receptor 2 (ERBB2); *c*, Correlation analysis is based on Spearman's rank test; *d*, p value <0.05 indicates significant.

**Table S2.** Correlation of the alterations of CDH1 with stem cell-related transcription factors.

| Gene A | Gene B<br>(SC-TF) <sup>a</sup> | p value <sup>b</sup> | Log odds<br>ratio <sup>c</sup> | Association <sup>d</sup>                         |
|--------|--------------------------------|----------------------|--------------------------------|--------------------------------------------------|
| CDH1   | <b>FOXM1</b>                   | <0.001               | -1.074                         | Tendency towards mutual exclusivity, Significant |
|        | <b>HMGA1</b>                   | <0.001               | -1.327                         | Tendency towards mutual exclusivity, Significant |
|        | <b>MCM2</b>                    | <0.001               | -1.506                         | Tendency towards mutual exclusivity, Significant |
|        | TBX3                           | <0.001               | 1.052                          | Tendency for co-occurrence, Significant          |
|        | MAF                            | 0.004                | 0.968                          | Tendency for co-occurrence, Significant          |
|        | <b>POU5F1</b>                  | 0.008                | -1.085                         | Tendency towards mutual exclusivity, Significant |
|        | <b>HIF1A</b>                   | 0.016                | -1.093                         | Tendency towards mutual exclusivity, Significant |
|        | GLI2                           | 0.017                | 0.708                          | Tendency for co-occurrence, Significant          |
|        | <b>SOX9</b>                    | 0.027                | -0.605                         | Tendency towards mutual exclusivity, Significant |
|        | KLF4                           | 0.032                | 0.792                          | Tendency for co-occurrence, Significant          |
|        | CTNNB1                         | 0.041                | 0.561                          | Tendency for co-occurrence, Significant          |
|        | <b>SNAI1</b>                   | 0.047                | -0.603                         | Tendency towards mutual exclusivity, Significant |
|        | <b>NANOG</b>                   | 0.057                | -1.199                         | Tendency towards mutual exclusivity, Marginal    |
|        | <b>PRDM14</b>                  | 0.087                | -0.382                         | Tendency towards mutual exclusivity, Marginal    |

Note: a, SC-TF, stem cell-related transcription factor. SC-TFs in bold indicate those having mutual exclusivity with the alterations of CDH1.

b, p values are derived from Fisher's Exact Test; p values less than 0.1 are included.

c, Log odds ratio indicates the likelihood that the events in genes A and B are mutually exclusive or co-occurrent across the selected cases.

d, Log odds ratio > 0: Association towards co-occurrence; Log odds ratio ≤ 0: Association towards mutual exclusivity; Significant means p value < 0.05; marginal means p value is 0.05-0.1.



**Table S3: List of genes enriched with the alterations of CDH2/4/6/17 in TCGA breast cancer datasets.**

| PROBE        | SYMBOL    | CDH2  | CDH4  | CDH6  | CDH17 |
|--------------|-----------|-------|-------|-------|-------|
| ILMN_1790350 | TPRG1     | -1.59 | -1.38 | -1.45 | -1.01 |
| ILMN_1703110 | KCNE4     | -1.19 | -0.76 | -1.38 | -0.94 |
| ILMN_1725099 | RAPGEF3   | -0.89 | -0.59 | -0.93 | -0.36 |
| ILMN_1790315 | CFAP69    | -0.81 | -0.6  | -0.88 | -0.51 |
| ILMN_101903  | APH1B     | -0.74 | -0.39 | -0.75 | -0.5  |
| ILMN_1728581 | C3ORF18   | -0.72 | -0.53 | -0.52 | -0.34 |
| ILMN_164548  | DLG4      | -0.61 | -0.45 | -0.43 | -0.27 |
| ILMN_2094313 | ZDHHC1    | -0.56 | -0.41 | -0.42 | -0.31 |
| ILMN_1787718 | SLC27A1   | -0.55 | -0.31 | -0.59 | -0.22 |
| ILMN_5011    | ZBTB4     | -0.36 | -0.34 | -0.38 | -0.23 |
| ILMN_1774427 | CALCOCO1  | -0.28 | -0.32 | -0.46 | -0.18 |
| ILMN_15629   | RBM5      | -0.27 | -0.21 | -0.33 | -0.18 |
| ILMN_1706246 | CCT5      | 0.39  | 0.43  | 0.61  | 0.3   |
| ILMN_28740   | SSRP1     | 0.4   | 0.29  | 0.41  | 0.14  |
| ILMN_1778717 | DBF4      | 0.44  | 0.47  | 0.47  | 0.25  |
| ILMN_2405521 | MTHFD2    | 0.46  | 0.32  | 0.4   | 0.28  |
| ILMN_1727055 | PARBPB    | 0.51  | 0.52  | 0.56  | 0.36  |
| ILMN_1724407 | TACC3     | 0.51  | 0.54  | 0.56  | 0.39  |
| ILMN_2160929 | FEN1      | 0.53  | 0.47  | 0.45  | 0.23  |
| ILMN_1708160 | KPNA2     | 0.54  | 0.52  | 0.74  | 0.46  |
| ILMN_915     | SPC25     | 0.55  | 0.61  | 0.53  | 0.39  |
| ILMN_1720526 | CENPN     | 0.56  | 0.76  | 0.7   | 0.34  |
| ILMN_2363027 | RAD51     | 0.57  | 0.67  | 0.56  | 0.49  |
| ILMN_4098    | CDKN3     | 0.58  | 0.61  | 0.6   | 0.46  |
| ILMN_2053650 | AURKA     | 0.59  | 1.1   | 0.75  | 0.66  |
| ILMN_1664630 | CHEK1     | 0.6   | 0.5   | 0.67  | 0.31  |
| ILMN_22512   | PRC1      | 0.6   | 0.66  | 0.73  | 0.4   |
| ILMN_1787280 | AUNIP     | 0.61  | 0.83  | 0.66  | 0.48  |
| ILMN_1710428 | CDK1      | 0.62  | 0.7   | 0.58  | 0.48  |
| ILMN_2413650 | STIL      | 0.62  | 0.58  | 0.71  | 0.36  |
| ILMN_2112460 | MAD2L1    | 0.65  | 0.69  | 0.69  | 0.48  |
| ILMN_183916  | MCM2      | 0.65  | 0.59  | 0.49  | 0.34  |
| ILMN_182117  | MKI67     | 0.65  | 0.67  | 0.74  | 0.51  |
| ILMN_1664533 | NUF2      | 0.66  | 0.72  | 0.67  | 0.51  |
| ILMN_1697751 | GINS1     | 0.67  | 0.63  | 0.54  | 0.47  |
| ILMN_1796589 | TRIP13    | 0.68  | 0.73  | 1.05  | 0.54  |
| ILMN_138188  | ARHGAP11A | 0.69  | 0.57  | 0.6   | 0.39  |
| ILMN_1797307 | BUB1B     | 0.69  | 0.56  | 0.56  | 0.37  |
| ILMN_869     | SKA3      | 0.69  | 0.69  | 0.65  | 0.5   |
| ILMN_8503    | KIF11     | 0.7   | 0.55  | 0.52  | 0.38  |
| ILMN_1278    | RAD54L    | 0.7   | 0.76  | 0.88  | 0.5   |
| ILMN_1674662 | TICRR     | 0.7   | 0.98  | 1.06  | 0.53  |
| ILMN_11802   | KIF23     | 0.71  | 0.67  | 0.67  | 0.43  |

|              |         |      |      |      |      |
|--------------|---------|------|------|------|------|
| ILMN_1751444 | NCAPG   | 0.71 | 0.78 | 0.64 | 0.56 |
| ILMN_1736176 | PLK1    | 0.71 | 0.78 | 0.92 | 0.64 |
| ILMN_177161  | CCNB2   | 0.72 | 0.81 | 0.85 | 0.55 |
| ILMN_18763   | CDCA3   | 0.72 | 0.74 | 0.84 | 0.63 |
| ILMN_1709085 | GSG2    | 0.73 | 0.56 | 0.81 | 0.38 |
| ILMN_2126706 | LMNB1   | 0.73 | 0.7  | 0.49 | 0.37 |
| ILMN_25893   | PTTG1   | 0.73 | 0.6  | 0.64 | 0.49 |
| ILMN_1700337 | TROAP   | 0.73 | 0.86 | 0.77 | 0.69 |
| ILMN_2215061 | ORC6    | 0.74 | 0.98 | 0.78 | 0.66 |
| ILMN_1806040 | TYMS    | 0.74 | 0.46 | 0.6  | 0.37 |
| ILMN_16427   | CCNA2   | 0.75 | 0.74 | 0.91 | 0.57 |
| ILMN_1709294 | CDCA8   | 0.75 | 0.78 | 0.96 | 0.54 |
| ILMN_4880    | DLGAP5  | 0.75 | 0.77 | 0.84 | 0.43 |
| ILMN_1697998 | MTFR2   | 0.75 | 0.85 | 0.9  | 0.55 |
| ILMN_1750508 | STMN1   | 0.75 | 0.65 | 0.61 | 0.34 |
| ILMN_1709484 | BLM     | 0.76 | 0.7  | 0.75 | 0.43 |
| ILMN_1716279 | CENPE   | 0.76 | 0.69 | 0.61 | 0.57 |
| ILMN_7092    | EXO1    | 0.76 | 0.7  | 0.85 | 0.42 |
| ILMN_1771039 | GTSE1   | 0.76 | 0.71 | 0.89 | 0.44 |
| ILMN_3057    | CDCA5   | 0.77 | 0.78 | 0.81 | 0.56 |
| ILMN_1753063 | KIF15   | 0.77 | 0.75 | 0.72 | 0.43 |
| ILMN_1731184 | MELK    | 0.77 | 0.9  | 0.94 | 0.57 |
| ILMN_1747016 | CEP55   | 0.78 | 0.69 | 0.95 | 0.61 |
| ILMN_20921   | ANLN    | 0.79 | 0.76 | 0.83 | 0.48 |
| ILMN_1815184 | ASPM    | 0.79 | 0.63 | 0.94 | 0.42 |
| ILMN_16725   | DEPDC1B | 0.79 | 0.75 | 0.78 | 0.55 |
| ILMN_1799667 | KIF4A   | 0.8  | 0.81 | 0.83 | 0.43 |
| ILMN_1657600 | NCAPH   | 0.81 | 0.73 | 0.7  | 0.53 |
| ILMN_12357   | UBE2C   | 0.81 | 1.13 | 0.97 | 0.76 |
| ILMN_8354    | CDC20   | 0.82 | 0.82 | 1.13 | 0.66 |
| ILMN_1651237 | CDT1    | 0.82 | 0.85 | 0.73 | 0.39 |
| ILMN_137805  | AURKB   | 0.83 | 0.91 | 0.92 | 0.72 |
| ILMN_1781943 | FAM83D  | 0.83 | 0.95 | 0.98 | 0.68 |
| ILMN_8595    | KIFC1   | 0.83 | 0.68 | 0.74 | 0.46 |
| ILMN_24472   | TTK     | 0.83 | 0.85 | 0.93 | 0.53 |
| ILMN_1736090 | BUB1    | 0.84 | 0.74 | 0.93 | 0.51 |
| ILMN_1733396 | CDC25A  | 0.84 | 0.94 | 0.84 | 0.54 |
| ILMN_137041  | HJURP   | 0.84 | 0.78 | 0.78 | 0.52 |
| ILMN_1792494 | TPX2    | 0.84 | 0.73 | 0.93 | 0.59 |
| ILMN_1710082 | BIRC5   | 0.85 | 0.93 | 1.04 | 0.77 |
| ILMN_27839   | KIF18A  | 0.85 | 0.76 | 0.72 | 0.51 |
| ILMN_1664511 | NDC80   | 0.85 | 0.65 | 0.74 | 0.57 |
| ILMN_1730825 | SGOL1   | 0.85 | 0.81 | 0.92 | 0.65 |
| ILMN_1771224 | SKA1    | 0.85 | 0.84 | 0.88 | 0.65 |
| ILMN_25582   | DEPDC1  | 0.87 | 0.77 | 0.95 | 0.5  |
| ILMN_25969   | KIF2C   | 0.87 | 0.78 | 0.99 | 0.65 |
| ILMN_1727459 | ORC1    | 0.88 | 0.76 | 0.91 | 0.43 |

|              |        |      |      |      |      |
|--------------|--------|------|------|------|------|
| ILMN_1751776 | CKAP2L | 0.89 | 0.69 | 0.77 | 0.5  |
| ILMN_1706194 | MCM10  | 0.9  | 1.02 | 1.01 | 0.66 |
| ILMN_2392472 | CENPA  | 0.91 | 0.89 | 1.07 | 0.68 |
| ILMN_18637   | RRM2   | 0.92 | 0.78 | 0.73 | 0.36 |
| ILMN_29093   | MYBL2  | 0.94 | 1.27 | 1.14 | 0.82 |
| ILMN_1757697 | NEIL3  | 0.94 | 0.85 | 0.75 | 0.53 |
| ILMN_18676   | FAM64A | 0.95 | 0.79 | 1    | 0.5  |
| ILMN_10352   | FOXN1  | 0.95 | 0.83 | 0.99 | 0.57 |
| ILMN_1808347 | CDC45  | 0.96 | 0.87 | 0.95 | 0.6  |
| ILMN_1753422 | E2F8   | 0.96 | 0.92 | 0.92 | 0.71 |
| ILMN_14100   | KIF20A | 0.96 | 0.81 | 0.82 | 0.49 |

**Table S4.** Correlation between stem cell-related transcription factors and ESR1, PGR, HER2 status.

| Protein A | Protein B          | Correlation               | p value      |
|-----------|--------------------|---------------------------|--------------|
| CTNNB1    | ESR1               | 0.10297                   | 0.0023038    |
| CTNNB1    | PGR                | -0.059108                 | 0.08073      |
| CTNNB1    | HER2               | 0.30128                   | 8.5142e-20   |
| FOXM1     | ESR1               | No matching records found |              |
| FOXM1     | PGR                | -0.2664                   | 1.1515e-15   |
| FOXM1     | HER2               | -0.093679                 | 0.005578     |
| FOXO3A    | ESR1               | No matching records found |              |
| FOXO3A    | PGR                | -0.060053                 | 0.076        |
| FOXO3A    | HER2               | -0.11294                  | 0.00082377   |
| GLI2      | ESR1, PGR, or HER2 | No matching records found |              |
| HIF1A     | ESR1, PGR, or HER2 | No matching records found |              |
| HMGA1B    | ESR1, PGR, or HER2 | No matching records found |              |
| KLF4      | ESR1, PGR, or HER2 | No matching records found |              |
| MAF       | ESR1, PGR, or HER2 | No matching records found |              |
| MCM2      | ESR1, PGR, or HER2 | No matching records found |              |
| NANOG     | ESR1, PGR, or HER2 | No matching records found |              |
| POU5F1    | ESR1, PGR, or HER2 | No matching records found |              |
| PRDM14    | ESR1, PGR, or HER2 | No matching records found |              |
| SNAI1     | ESR1, PGR, or HER2 | No matching records found |              |
| SOX2/SOX9 | ESR1, PGR, or HER2 | No matching records found |              |
| STAT3     | ESR1, PGR, or HER2 | No matching records found |              |
| WWTR1     | ESR1, PGR, or HER2 | No matching records found |              |
| TBX3      | ESR1, PGR, or HER2 | No matching records found |              |
| TWIST1    | ESR1, PGR, or HER2 | No matching records found |              |
| ZEB1      | ESR1, PGR, or HER2 | No matching records found |              |
| LIN28 A/B | ESR1, PGR, or HER2 | No matching records found |              |
| MYC       | ESR1               | -0.15839                  | 0.0000025322 |
| MYC       | PGR                | 0.032339                  | 0.33961      |
| MYC       | HER2               | -0.13336                  | 0.000076665  |

Note: Data analysis was done on a dataset of TCGA Breast Invasive Carcinoma with 901 samples where RPPA data were available (<http://tcpaportal.org/tcpa>). P-value is based on Spearman's rank test. 'No matching records found' indicates that RPPA data for the protein in question is not available in the database for the test. ESR1: estrogen receptor subunit 1. PGR: progesterone receptor. HER2: human epidermal growth factor receptor 2.
